# Supplementary material for: Development and evaluation of RhizoQOL, a quality-of-life caregiver-reported survey for rhizomelic chondrodysplasia punctata, a rare peroxisomal disorder
Source: Springer Nature journal article supplement (doi:10.1186/s13023-025-03660-0), 2025-03-31
Supplement: MOESM1 [file 13023_2025_3660_MOESM1_ESM.pdf]

**Supplementary Table 1: Demographic data for focus group participants**

| <b>Total</b>                      | <b>N</b>  | <b>%</b>   |
|-----------------------------------|-----------|------------|
|                                   | <b>28</b> | <b>100</b> |
| <b>Family Role</b>                |           |            |
| Mother                            | 18        | 64.3       |
| Father                            | 9         | 32.1       |
| Step Parent                       | 1         | 3.6        |
| <b>Age (years)</b>                |           |            |
| 25-34                             | 16        | 57.1       |
| 35-44                             | 7         | 25.0       |
| 45-54                             | 4         | 14.3       |
| 55-64                             | 1         | 3.6        |
| <b>Ethnicity</b>                  |           |            |
| White                             | 27        | 96.4       |
| Declined to Answer                | 1         | 3.6        |
| <b>Marital Status</b>             |           |            |
| Single                            | 0         | 0.0        |
| Married                           | 28        | 100.0      |
| <b>Highest Education</b>          |           |            |
| Technical                         | 1         | 3.6        |
| High School Grad                  | 7         | 25.0       |
| Some College                      | 7         | 25.0       |
| Bachelor's                        | 8         | 28.6       |
| Grad/Professional Degree          | 2         | 7.1        |
| High School Grad and Some College | 1         | 3.6        |
| Some High School, No GED          | 1         | 3.6        |
| Graduate                          | 1         | 3.6        |
| <b>Employment Status</b>          |           |            |
| Self-Employed                     | 2         | 7.1        |
| Unable to work                    | 3         | 10.7       |
| Part-Time                         | 2         | 7.1        |
| Full-Time                         | 13        | 46.4       |
| Retired                           | 1         | 3.6        |
| Homemaker/Unable to work          | 6         | 21.5       |
| Declined to Answer                | 1         | 3.6        |
| <b>Household Income (\$)</b>      |           |            |
| 30-49K                            | 3         | 10.7       |
| 50-69K                            | 4         | 14.3       |
| 70-89K                            | 5         | 17.9       |

|                                               |    |      |
|-----------------------------------------------|----|------|
| >90K                                          | 11 | 39.3 |
| Decline                                       | 5  | 17.9 |
| <b>Region of Residence</b>                    |    |      |
| Midwest                                       | 8  | 28.6 |
| Southeast                                     | 14 | 50.0 |
| Southwest                                     | 1  | 3.6  |
| West                                          | 4  | 14.3 |
| Outside US                                    | 1  | 3.6  |
| <b>Number of Affected Children</b>            |    |      |
| 1                                             | 24 | 85.7 |
| 2                                             | 4  | 14.3 |
| <b>Status of Child(ren) (Alive/ Deceased)</b> |    |      |
| Alive                                         | 23 | 82.1 |
| Deceased                                      | 5  | 17.9 |
| <b>Age Range of Affected Children (years)</b> |    |      |
| <1                                            | 2  | 7.1  |
| 1-4                                           | 14 | 50.0 |
| 5-7                                           | 4  | 14.3 |
| 8-10                                          | 3  | 10.7 |
| 11-13                                         | 3  | 10.7 |
| 14-17                                         | 2  | 7.1  |
